# Supplementary material
Source: MDPI journal article supplement (https://www.mdpi.com/2071-1050/15/16/12470)
Supplement: s1 [file s1]

**Table S1.** Global vision of the 81 articles analysed.

| Title and Authors                                                                                                                              | Product                         | Raw Material  | Comparison with other polymers | Multifunctionality | System Boundaries | Software         | LCIA Methodology    | Databases                                                                                                                                        |
|------------------------------------------------------------------------------------------------------------------------------------------------|---------------------------------|---------------|--------------------------------|--------------------|-------------------|------------------|---------------------|--------------------------------------------------------------------------------------------------------------------------------------------------|
| Valorisation of polylactic acid (PLA) waste: A comparative life cycle assessment of various solvent-based chemical recycling technologies [35] | Treatment of 1 t of PLA residue | NA            | NA                             | NA                 | Cradle-to-gate    | GaBi v.10        | NA                  | International; Reference Life Cycle Data System (ILCD); Product Environmental Footprint (PEF). Industrial data collected from producing company. |
| Ecological analysis of selected stages of the food packaging production process [49]                                                           | Bottle                          | NA            | PET                            | NA                 | Cradle-to-gate    | SimaPro          | Ecoindicator 99     | Ecoinvent (version 3.3); Scientific literature.                                                                                                  |
| Application of LCA Method for Assessment of Environmental Impacts of a Polylactide (PLA) Bottle Shaping [36]                                   | Bottle                          | Corn          | PET                            | NA                 | Cradle-to-gate    | SimaPro v. 8.4.1 | ReCiPe 2016         | Data on individual process steps from company in Poland; Ecoinvent 3.2.                                                                          |
| Life Cycle Assessment of Two Alternative Plastics for Bottle Production [30]                                                                   | Bottle                          | NA            | PET                            | NA                 | Cradle-to-gate    | SimaPro v.8.4.0  | CML 2; ReCiPe2016.  | Ecoinvent;                                                                                                                                       |
| Using atmospheric plasma to design multilayer film                                                                                             | Packaging “clamshell”           | Potato Starch | PET and PP                     | System Expansion   | Cradle-to-grave   | SimaPro v. 7.3.3 | Impact 2002+ ReCiPe |                                                                                                                                                  |

| Title and Authors                                                                                                   | Product                       | Raw Material | Comparison with other polymers | Multifunctionality         | System Boundaries | Software            | LCIA Methodology                 | Databases                                                                                                   |
|---------------------------------------------------------------------------------------------------------------------|-------------------------------|--------------|--------------------------------|----------------------------|-------------------|---------------------|----------------------------------|-------------------------------------------------------------------------------------------------------------|
| from polylactic acid and thermoplastic starch: a screening Life Cycle Assessment [50]                               |                               |              |                                |                            |                   |                     |                                  | Data for plasma treatment from pilot plant.                                                                 |
| Environmental performance of bioplastic packaging on fresh food produce: A consequential life cycle assessment [51] | Management of 1 t of residues | Corn         | PP, HDPE, LPPE and PET         | NA                         | Cradle-to-grave   | Open LCATM v.1.10.2 | Environmental Footprint (EF) 2.0 | Environmental Footprint (EF) 2.0; Production of PLA packages – data from Ecoinvent 3.5 based on NatureWorks |
| Life cycle assessment (LCA) of bio-based packaging solutions for extended shelf life (ESL) milk [29]                | Packaging for 1L of milk      | Corn         | PET and HDPE                   | NA                         | Cradle-to-grave   | SimaPro v. 9        | ILCD 2011                        | Ecoinvent 3                                                                                                 |
| Life cycle assessment of bioplastic production from whey protein obtained from dairy residues [11]                  | 1000 kg of bioplastics        | Corn         | PP, LPDE and HDPE              | Allocation by substitution | Cradle-to-grave   | SimaPro v.8.4.0.0   | CML baseline 2000                | Ecoinvent 3                                                                                                 |
| Assessment of the environmental break-even point for deposit return systems through an LCA                          | Cup                           | NA           | PP and PET                     | NA                         | Cradle-to-grave   | SimaPro v.8         | NA                               | Ecoinvent v3.3                                                                                              |

| Title and Authors                                                                                                                                                                               | Product                              | Raw Material | Comparison with other polymers | Multifunctionality | System Boundaries                  | Software            | LCIA Methodology                                      | Databases                                                 |
|-------------------------------------------------------------------------------------------------------------------------------------------------------------------------------------------------|--------------------------------------|--------------|--------------------------------|--------------------|------------------------------------|---------------------|-------------------------------------------------------|-----------------------------------------------------------|
| analysis of single-use and reusable cups [25]<br>Using life cycle assessment to quantify the environmental benefit of upcycling vine shoots as fillers in biocomposite packaging materials [52] | Tray                                 | Corn         | PP and PHBV                    | NA                 | Cradle-to-grave                    | SimaPro v.8.5       | ReCiPe 2016 Midpoint Hierarchist (H)                  | Ecoinvent v.3.4; Scientific literature and industry data. |
| Life cycle assessment of wheat gluten powder and derived packaging film [53]                                                                                                                    | Film with 1m <sup>2</sup> and 0.15mm | Wheat        | LDPE                           | Mass Allocation    | Cradle-to-factory gate             | NA                  | ReCiPe endpoint (H); IMPACT 2002+ Ecoindicator 99 (H) | Ecoinvent 2.1; Data from scientific literature            |
| Life cycle assessment (LCA) of PET and PLA bottles for the packaging of fresh pasteurised milk: The role of the manufacturing process and the disposal scenario [54]                            | Bottle                               | Sugar Cane   | PET                            | NA                 | Cradle-to-cradle                   | SimaPro v. 9.0.0.48 | IMPACT 2002+                                          | Ecoinvent 3; Primary data; Scientific literature          |
| Life Cycle Assessment of Polylactic Acid and Polyethylene Terephthalate (PET) Bottles for Drinking Water [37]                                                                                   | Bottle                               | Corn         | PET                            | Mass Allocation    | Cradle-to-gate and Cradle-to-grave | SimaPro v.7         | Ecoindicator 99                                       | Ecoindicator 99 and Ecoinvent v.2.0                       |

| Title and Authors                                                                                                                                                          | Product                                              | Raw Material                                        | Comparison with other polymers   | Multifunctionality  | System Boundaries | Software                                                            | LCIA Methodology    | Databases                                                                                                 |
|----------------------------------------------------------------------------------------------------------------------------------------------------------------------------|------------------------------------------------------|-----------------------------------------------------|----------------------------------|---------------------|-------------------|---------------------------------------------------------------------|---------------------|-----------------------------------------------------------------------------------------------------------|
| Environmental impacts of functional fillers in polylactide (PLA)-based bottles using life cycle assessment methodology [24]                                                | Bottle                                               | Potato Starch                                       | PLA fibers and CaCO <sub>3</sub> | NA                  | Cradle-to-gate    | eFootprint software system of IKE Environmental Technology Co., Ltd | NA                  | Data from Chinese production; CLCD-China-ECER0.8.1; Ecoinvents-Public 2.2.0; Ecoinvent 3.1.0; ELCD 3.0.0. |
| Life Cycle Assessment of Bioplastics and Food Waste Disposal Methods [55]                                                                                                  | 1 kg of effluent to treat bioplastics and food waste | NA                                                  | NA                               | NA                  | Cradle-to-grave   | SimaPro                                                             | ReCiPe Midpoint (H) | Ecoinvent and Easetech                                                                                    |
| Biopolymer production and end of life comparisons using life cycle assessment. [5]                                                                                         | 1 kg of polymer                                      | Corn                                                | PET, PE and TPS                  | Physical allocation | Cradle-to-grave   | NA                                                                  | TRACI v. 2.1.       | Scientific literature and data collected.                                                                 |
| Techno-economic risk assessment, life cycle analysis and life cycle costing for poly (butylene succinate) and poly (lactic acid) production using renewable resources [23] | 1 kg of PLA                                          | Corn glucose syrup, maize straw and sugar beet pulp | PBS                              | Economic allocation | Cradle-to-gate    | GaBi                                                                | ReCiPe 1.08         | GaBi; CML 2001; Scientific literature; UniSim.                                                            |
| Assessment of the environmental profile of                                                                                                                                 | Packaging “clamshell”                                | Corn                                                | PET and PS                       | NA                  | Cradle-to-cradle  | SimaPro v. 7.18                                                     | IMPACT 2002+        | Ecoinvent; Plastics Europe.                                                                               |

| Title and Authors                                                                                                                                           | Product                         | Raw Material                  | Comparison with other polymers | Multifunctionality  | System Boundaries                | Software         | LCIA Methodology                           | Databases                                                                                                                                                   |
|-------------------------------------------------------------------------------------------------------------------------------------------------------------|---------------------------------|-------------------------------|--------------------------------|---------------------|----------------------------------|------------------|--------------------------------------------|-------------------------------------------------------------------------------------------------------------------------------------------------------------|
| PLA, PET and PS clamshell containers using LCA methodology [21]                                                                                             |                                 |                               |                                |                     |                                  |                  |                                            |                                                                                                                                                             |
| A Comparative Life Cycle Assessment of Meat Trays Made of Various Packaging Materials [32]                                                                  | Tray                            | Corn                          | PS, PET and PP                 | NA                  | Cradle-to-gate (and end-of-life) | GaBi v.8         | ILCD; Recommendations from ILCD/PEF v.1.09 | Data from industry - GmbH & Co. KG (Troisdorf, Germany) e Sirap Gema SpA (Verolanuova (BS), Italy) Pilot plants; Scientific literature; GaBi and Ecoinvent. |
| Life cycle assessment of recycling options for polylactic acid [22]                                                                                         | Treatment of 1 t of PLA residue | Corn, Beetroot and Sugar cane | NA                             | NA                  | Cradle-to-grave                  | GaBi 2017        | ILCD                                       |                                                                                                                                                             |
| A cradle-to-gate life cycle assessment of wood fibre-reinforced polylactic acid (PLA) and polylactic acid/thermoplastic starch (PLA/TPS) biocomposites [56] | Packaging “clamshell”           | Cellulosic fibers from wood   | PP                             | Economic allocation | Cradle-to-gate                   | NA               | TRACI + CED                                | Data from laboratory research; LCI database from USA; US-EI                                                                                                 |
| Life Cycle Impact Assessment of Polylactic                                                                                                                  | NA                              | Sugar cane                    | NA                             | Economic allocation | Cradle-to-gate                   | SimaPro v. 8.4.0 | ILCD 2011 Midpoint +                       | Data of PLA production from Total Corbion;                                                                                                                  |

| Title and Authors                                                                                                                                                                                                                                                                                                                                                                                                                                                                                                                                                                                       | Product     | Raw Material                                    | Comparison with other polymers | Multifunctionality                                           | System Boundaries | Software                | LCIA Methodology         | Databases                                                                      |
|---------------------------------------------------------------------------------------------------------------------------------------------------------------------------------------------------------------------------------------------------------------------------------------------------------------------------------------------------------------------------------------------------------------------------------------------------------------------------------------------------------------------------------------------------------------------------------------------------------|-------------|-------------------------------------------------|--------------------------------|--------------------------------------------------------------|-------------------|-------------------------|--------------------------|--------------------------------------------------------------------------------|
| Acid (PLA) Produced from Sugarcane in Thailand [34]<br>Cradle-to-grave life cycle assessment of single-use cups made from PLA, PP and PET [3]<br>Life cycle assessment of biobased chemicals from different agricultural feedstocks [57]<br>Comparative Study of a Life Cycle Assessment for Bio-Plastic Straws and Paper Straws: Malaysia's Perspective [58]<br>Life cycle and economic assessment of sugarcane bagasse valorization to lactic acid [26]<br>Carbon and energy footprints of high-value food trays and lidding films made of common bio-based and conventional packaging materials [59] | Cup         | Corn and sugar cane                             | PET and PP                     | Physical allocation, replacement and expansion of the system | Cradle-to-grave   | GaBi 2017               | ILCD                     | Scientific literature.<br>Primary data;<br>Scientific literature;<br>Ecoinvent |
|                                                                                                                                                                                                                                                                                                                                                                                                                                                                                                                                                                                                         | 1 kg of PLA | Sugar cane, corn and sugar from beetroot        | NA                             | NA                                                           | Cradle-to-gate    | GaBi v.10.0.0.71        | CML 2001–2016            | Scientific literature                                                          |
|                                                                                                                                                                                                                                                                                                                                                                                                                                                                                                                                                                                                         | Straws      | Corn                                            | NA                             | NA                                                           | Cradle-to-grave   | SuperPro Designer v.9.0 | NA                       | Scientific literature and industry data.                                       |
|                                                                                                                                                                                                                                                                                                                                                                                                                                                                                                                                                                                                         | 1 kg of PLA | Sugar cane bagasse                              | NA                             | Economic allocation                                          | Cradle-to-gate    | OpenLCA v.1.9           | ReCiPe (H) midpoint 2016 | Ecoinvent;<br>Research data;<br>ASPEN Plus simulation.                         |
|                                                                                                                                                                                                                                                                                                                                                                                                                                                                                                                                                                                                         | Tray        | Sugar cane, corn, wheat and sugar from beetroot | PET, PP and PE                 | NA                                                           | Cradle-to-grave   | PAS 2050                | NA                       | Scientific literature                                                          |

| Title and Authors                                                                                                                | Product               | Raw Material    | Comparison with other polymers | Multifunctionality  | System Boundaries                  | Software        | LCIA Methodology          | Databases                                                                                                                      |
|----------------------------------------------------------------------------------------------------------------------------------|-----------------------|-----------------|--------------------------------|---------------------|------------------------------------|-----------------|---------------------------|--------------------------------------------------------------------------------------------------------------------------------|
| Comparative assessment of the environmental profile of PLA and PET drinking water bottles from a life cycle perspective [60]     | Bottle                | Mandioca        | PET                            | Physical allocation | Cradle-to-grave                    | SimaPro         | CML 2 baseline 2000       | Association of Plastics Manufacturers of Europe (APME); Other data.                                                            |
| Sustainable bioplastics from amyloid fibril-biodegradable polymer blends [31]                                                    | 1 kg of PLA           | Organic residue | HDPE and PBS                   | Economic allocation | Cradle-to-grave                    | NA              | EF3.0                     | Ecoinvent v.3.6                                                                                                                |
| Bioplastic Wastes: The Best Final Disposition for Energy Saving. [61]                                                            | Packaging “clamshell” | Corn            | PS and PE                      | NA                  | Cradle-to-gate and Cradle-to-grave | SimaPro v. 7.2  | GWP100a                   | Ecoinvent v.2.2; NatureWorks and Mater-Bi Data collected from producers, companies, laboratories, pilot plants and literature. |
| Comparative life cycle assessment of coffee jar lids made from biocomposites containing poly (lactic acid) and banana fiber [62] | Lid                   | Corn            | HDPE                           | Economic allocation | Cradle-to-grave                    | SimaPro v.8.3   | ILCD ReCiPe midpoint 2016 |                                                                                                                                |
| Banana fibre-biocomposite applied to bottle lid case - life-cycle engineering model for material selection [63]                  | Bottle                | NA              | PET                            | NA                  | Cradle-to-gate                     | SimaPro v.8.4.0 | CML 2; ReCiPe2016.        | Ecoinvent 3.2; Data from Polish company.                                                                                       |

| Title and Authors                                                                                                                                                        | Product                                  | Raw Material                                    | Comparison with other polymers | Multifunctionality | System Boundaries | Software                      | LCIA Methodology    | Databases                             |
|--------------------------------------------------------------------------------------------------------------------------------------------------------------------------|------------------------------------------|-------------------------------------------------|--------------------------------|--------------------|-------------------|-------------------------------|---------------------|---------------------------------------|
| Influence of the source of starch and plasticizers on the environmental burden of starch-Brazil nut fiber biocomposite production: A life cycle assessment approach [28] | 1 kg of biocomposite reinforced with BSF | Sugar cane, corn, wheat and sugar from beetroot | TPA and PP                     | NA                 | Cradle-to-gate    | SimaPro v.9.1.0.11            | ReCiPe endpoint     | Ecoinvent 3.6; Scientific literature. |
| Evolution of drinking straws and their environmental, economic and societal implications [64]                                                                            | 1 kg of PLA                              | Corn                                            | PP                             | NA                 | Cradle-to-grave   | SimaPro v.8.0.4.26 multi-user | NA                  | Ecoinvent 3                           |
| Circular economy: Comparative life cycle assessment of fossil polyethylene terephthalate (PET) and its recycled and bio-based counterparts [33]                          | 1 metric t of plastic                    | Corn starch                                     | PET                            | NA                 | Cradle-to-grave   | SimaPro                       | ReCiPe Midpoint (H) | Ecoinvent and Easetech                |
| Plastic recycling in a circular economy; determining environmental performance through an LCA matrix model approach [65]                                                 | 1 t of final product                     | NA                                              | PP, PE and ABS                 | NA                 | Cradle-to-grave   | SimaPro v.8                   | ReCiPe 2008         | Ecoinvent 3.4                         |
| Plastic (PET) vs bioplastic (PLA) or refillable                                                                                                                          | Bottle                                   | Corn                                            | PET                            | NA                 | Cradle-to-grave   | Open LCATM v.1.8              | ReCiPe              | Ecoinvent; Scientific                 |



| Title and Authors                                                                                                                                                                                                                                                                                                                                                     | Product               | Raw Material | Comparison with other polymers | Multifunctionality               | System Boundaries | Software                      | LCIA Methodology | Databases                                                                                                                                          |
|-----------------------------------------------------------------------------------------------------------------------------------------------------------------------------------------------------------------------------------------------------------------------------------------------------------------------------------------------------------------------|-----------------------|--------------|--------------------------------|----------------------------------|-------------------|-------------------------------|------------------|----------------------------------------------------------------------------------------------------------------------------------------------------|
| aluminium bottles – What is the most sustainable choice for drinking water? A life-cycle (LCA) analysis.[1]<br>Carbon footprint of plastic from biomass and recycled feedstock: methodological insights [66]<br>Sustainability Analysis of Active Packaging for the Fresh Cut Vegetable Industry by Means of Attributional & Consequential Life Cycle Assessment [67] | 1 kg of PLA           | Corn         | PP                             | NA                               | Cradle-to-grave   | SimaPro v.8.0.4.26 multi-user | NA               | literature;<br>Industry reports.<br><br>Ecoinvent 3                                                                                                |
|                                                                                                                                                                                                                                                                                                                                                                       | Packaging “clamshell” | Corn starch  | PP                             | End-of-life processes allocation | Cradle-to-grave   | SimaPro v.8                   | ReCiPe           | Ecoinvent v3.2;<br>Scientific literature.                                                                                                          |
| Applications of life cycle assessment to NatureWorks™ polylactide (PLA) production [68]                                                                                                                                                                                                                                                                               | NA                    | Corn         | PET                            | NA                               | Cradle-to-gate    | NA                            | NA               | Association of Plastics Manufacturers of Europe (APME); Data of cultivation from Nebraska and Iowa; Data from Cargill Dow; Boustead Core database; |

| Title and Authors                                                                                                                             | Product                     | Raw Material       | Comparison with other polymers | Multifunctionality | System Boundaries | Software | LCIA Methodology | Databases                                                                                                                                                                   |
|-----------------------------------------------------------------------------------------------------------------------------------------------|-----------------------------|--------------------|--------------------------------|--------------------|-------------------|----------|------------------|-----------------------------------------------------------------------------------------------------------------------------------------------------------------------------|
| Comparing two types of mainstream disposable lunch boxes by LCA and exploring the possibility of converting carbon dioxide into products [69] | 1 kg of tableware           | Corn               | NA                             | NA                 | Cradle-to-gate    | SimaPro  | Eco-indicator99  | Local information. Environmental Impact List of the Disposable Degradable Plastic Tableware Production Project of Wuhu Lv Kang Environmental Protection Technology Co., Ltd |
| 3D printing to enable the reuse of marine plastic waste with reduced with reduced environmental impacts [27]                                  | 1 kg of 3D printed material | Corn               | Bio-PA and PHB                 | NA                 | Cradle-to-grave   | OpenLCA  | ReCiPe           | Ecoinvent v3.7 Gabi bioplastics 2019                                                                                                                                        |
| Comparative Assessment of the Greenhouse Gas Emission                                                                                         | NA                          | Corn and Sugarcane | PS                             | NA                 | Cradle-to-grave   | NA       | NA               | Data from three regions of Thailand                                                                                                                                         |

| Title and Authors                                                                                                                                           | Product                                                                  | Raw Material | Comparison with other polymers | Multifunctionality | System Boundaries | Software | LCIA Methodology | Databases                                                    |
|-------------------------------------------------------------------------------------------------------------------------------------------------------------|--------------------------------------------------------------------------|--------------|--------------------------------|--------------------|-------------------|----------|------------------|--------------------------------------------------------------|
| and Land Use Capacity of Plastics Waste in Thailand [70]                                                                                                    |                                                                          |              |                                |                    |                   |          |                  |                                                              |
| Development and characterization of sustainable PLA-Olive wood waste composites for rehabilitation applications using Fused Filament Fabrication (FFF) [71] | 3D ornamental element printed by FFF technique with a volume of 8000 cm3 | Corn         | NA                             | NA                 | Cradle-to-gate    | SimaPro  | CML              | Ecoinvent v3.8                                               |
| Life Cycle Assessment of Biodegradable Polylactic Acid (PLA) Plastic Packaging Products—Taking Tianjin, China as a Case Study [72]                          | NA                                                                       | Corn         | NA                             | NA                 | NA                | NA       | NA               | Data from MSW treatment facility<br>Data found in literature |
| Life cycle assessment of disposable drinking straws - A trade-off analysis with marine litter in the United States [73]                                     | 500 million single-use straws                                            | Corn         | PP                             | NA                 | Cradle-to-grave   | GaBi     | CML              | Data found in literature<br>GaBi<br>Ecoinvent                |

| Title and Authors                                                                                                             | Product                                                                                                                                                                                                        | Raw Material | Comparison with other polymers | Multifunctionality | System Boundaries | Software | LCIA Methodology | Databases                                                                                                    |
|-------------------------------------------------------------------------------------------------------------------------------|----------------------------------------------------------------------------------------------------------------------------------------------------------------------------------------------------------------|--------------|--------------------------------|--------------------|-------------------|----------|------------------|--------------------------------------------------------------------------------------------------------------|
|                                                                                                                               |                                                                                                                                                                                                                |              |                                |                    |                   |          |                  | US Life Cycle Inventory                                                                                      |
| Life Cycle Assessment of Selected Single-Use Plastic Products towards Evidence-Based Policy Recommendations in Sri Lanka [74] | 1-time use of cutlery<br>fork/spoon<br>1 cotton bud<br>1 Joss-Stick wrapper<br>1 cloth wick wrapper<br>1-time use of <750 mL pesticide bottle<br>1 grocery bag<br>1 straw<br>1-time use of 750 mL water bottle | Corn         | PS, PP, LDPE, HDPE and PET     | NA                 | Cradle-to-grave   | SimaPro  | ReCiPe IPCC 2013 | Data found in literature<br>Data from unspecified LCI databases<br>Data from manufacturers<br>Ecoinvent v3.0 |
| Challenges for Sustainability in Packaging of Fresh Vegetables in Organic Farming [75]                                        | packaging bag                                                                                                                                                                                                  | Corn         | LDPE and PCSB                  | NA                 | Cradle-to-grave   | SimaPro  | ReCiPe 2016 CED  | Data found in literature<br>Ecoinvent v3.4                                                                   |

| Title and Authors                                                                                                                       | Product                                                             | Raw Material | Comparison with other polymers | Multifunctionality | System Boundaries | Software | LCIA Methodology | Databases                                                           |
|-----------------------------------------------------------------------------------------------------------------------------------------|---------------------------------------------------------------------|--------------|--------------------------------|--------------------|-------------------|----------|------------------|---------------------------------------------------------------------|
| Melt Extrusion of Environmentally Friendly Poly(L-lactic acid)-Sodium Metabisulfite Films for Antimicrobial Packaging Applications [76] | 1 kg of packaging film                                              | Corn         | NA                             | NA                 | Cradle-to-grave   | OpenLCA  | ILCD             | Ecoinvent v3.3                                                      |
| Application of LCA Method for Assessment of Environmental Impacts of a Polylactide (PLA) Bottle Shaping [36]                            | 1L PLA blottles                                                     | NA           | NA                             | NA                 | NA                | SimaPro  | ReCiPe 2016      | Ecoinvent v.3.3                                                     |
| Hybrid life cycle assessment of potato pulp valorisation in biocomposite production [38]                                                | 1 kg biocomposite                                                   | Potato pulp  | PHA                            | NA                 | NA                | NA       | NA               | Data from literature<br>Ecoinvent v.3<br>Potato Council<br>EXIOBASE |
| Life cycle greenhouse gas emissions and energy use of polylactic acid,                                                                  | one kg of waste plastics that ends up in the landfill or composting | Corn         | Bio-PE, HDPE and LDPE          | NA                 | Cradle-to-grave   | NA       | REET<br>IPCC     | Data found in literature<br>Data found in REET model                |

| Title and Authors                                                                                                                                                                                              | Product                                         | Raw Material | Comparison with other polymers | Multifunctionality              | System Boundaries | Software | LCIA Methodology                       | Databases                                                 |
|----------------------------------------------------------------------------------------------------------------------------------------------------------------------------------------------------------------|-------------------------------------------------|--------------|--------------------------------|---------------------------------|-------------------|----------|----------------------------------------|-----------------------------------------------------------|
| bio-derived polyethylene, and fossil-derived polyethylene [77]<br>Eco-efficiency of Poly (lactic acid)-Starch-Cotton composite with high natural cotton fiber content: environmental and functional value [78] | production of 100 g of thermoplastic composites | Corn         | NA                             | NA                              | Cradle-to-gate    | BEST     | Koellner model<br>EU PEF<br>BASF model | Data based on regional average<br>Ecoinvent               |
| Carbon Footprint of Packaging Films Made from LDPE, PLA, and PLA/PBAT Blends in South Korea [79]                                                                                                               | 400,000 pieces of film                          | Corn         | LDPE                           | Three waste treatment scenarios | Cradle-to-grave   | SimaPro  | CML IPCC                               | corn producers of 26 counties in the U.S<br>Ecoinvent 3.0 |
| Close-looped recycling of polylactic acid used in 3D printing - An experimental investigation and life cycle assessment [80]                                                                                   | 1 kg of 3D printable PLA                        | Corn         | NA                             | NA                              | End-of-Life       | GaBi     | ReCiPe                                 | Primary data<br>Data from GaBi database                   |
| Cradle-to-Grave Life Cycle Assessment and Techno-                                                                                                                                                              | NA                                              | NA           | NA                             | Economic allocation             | Cradle-to-grave   | NA       | TRACI                                  | MBase database                                            |

| Title and Authors                                                                                | Product                         | Raw Material          | Comparison with other polymers | Multifunctionality  | System Boundaries | Software | LCIA Methodology  | Databases                                                      |
|--------------------------------------------------------------------------------------------------|---------------------------------|-----------------------|--------------------------------|---------------------|-------------------|----------|-------------------|----------------------------------------------------------------|
| Economic Analysis of Polylactic Acid Composites with Traditional and Bio-Based Fillers [81]      |                                 |                       |                                |                     |                   |          |                   |                                                                |
| Eco-Efficiency Assessment of Bioplastics Production Systems and End-of-Life Options [82]         | Boxes of 650 mL                 | Cassava and Sugarcane | PHAs, PBS and PP               | Economic allocation | Cradle-to-grave   | Excel    | ReCiPe            | Thai national life cycle inventory database<br>Ecoinvent v 3.0 |
| Environmental Impact Assessment of Polylactide(PLA)/Chicken Feathers Biocomposite Materials [83] | Plate                           | Corn                  | NA                             | NA                  | Cradle-to-gate    | NA       | CML ReCiPe        | primary data<br>Data from manufacturer<br>Ecoinvent v 3.0      |
| Life cycle assessment of bottled water: A case study of Green2O products [84]                    | Bottle                          | Corn                  | PET                            | NA                  | Cradle-to-grave   | SimaPro  | Impact 2002+ IPCC | Green2O<br>Ecoinvent v3                                        |
| Systematic assessment of triticale-based biorefinery                                             | Producing 100,000 tonnes of PLA | Triticale             | NA                             | NA                  | Cradle-to-gate    | NA       | IMPACT 2002+      | Ecoinvet                                                       |

| Title and Authors                                                                                                                                                                    | Product                                                             | Raw Material | Comparison with other polymers | Multifunctionality | System Boundaries                      | Software | LCIA Methodology          | Databases                      |
|--------------------------------------------------------------------------------------------------------------------------------------------------------------------------------------|---------------------------------------------------------------------|--------------|--------------------------------|--------------------|----------------------------------------|----------|---------------------------|--------------------------------|
| strategies: environmental evaluation using life cycle assessment [85]                                                                                                                |                                                                     |              |                                |                    |                                        |          |                           |                                |
| An attributional Life Cycle Assessment application experience to highlight environmental hotspots in the production of foamy polylactic acid trays for freshfood packaging usage[86] | 1kg of trays                                                        | corn         | NA                             | NA                 | Manufacturing, delivering and disposal | SimaPro  | Impact 2002+              | Company data<br>Ecoinvent v2.2 |
| Degradability and Sustainability of Nanocomposites Based on Polylactic Acid and Chitin Nano Fibrils [87]                                                                             | 1 kg of pellets                                                     | Corn         | NA                             | NA                 | Cradle-to-grave                        | SimaPro  | ILCD ReCiPe               | Ecoinvent v.2                  |
| Evaluation of physiochemical/microbial properties and life cycle assessment (LCA) of PLA-based nanocomposite active packaging [88]                                                   | Providing customers with 100 000 kg of fresh fruits during one year | Corn         | PET                            | NA                 | Cradle-to-grave                        | SimaPro  | IMPACT 2002+<br>EDIP 2003 | Primary data<br>Ecoinvent v.3  |



| Title and Authors                                                                                                                 | Product                                                                                         | Raw Material | Comparison with other polymers | Multifunctionality               | System Boundaries | Software | LCIA Methodology | Databases                                                                                  |
|-----------------------------------------------------------------------------------------------------------------------------------|-------------------------------------------------------------------------------------------------|--------------|--------------------------------|----------------------------------|-------------------|----------|------------------|--------------------------------------------------------------------------------------------|
| Greenhouse gas mitigation for U.S. plastics production: energy first, feedstocks later [89]                                       | The set of services provided by the entire U.S. national production of commodity thermoplastics | Corn         | NA                             | Economic allocation              | Cradle-to-gate    | NA       | REET<br>IPCC     | Data found in literature                                                                   |
| Comparative assessment of global warming impact and eco-efficiency of PS, PET and PLA boxes [90]                                  | boxes with the same carrying capacity of 100 grams                                              | Corn         | PS and PET                     | End-of-life processes allocation | Cradle-to-grave   | NA       | IPCC 2006        | Data found in literature<br>Ecoinvent v2.2                                                 |
| Life Cycle Assessment of Poly(Lactic Acid) (PLA): Comparison Between Chemical Recycling, Mechanical Recycling and Composting [91] | 1 kg of residual PLA                                                                            | Corn         | NA                             | End-of-life processes allocation | End-of-Life       | SimaPro  | ReCiPe           | Data found in literature<br>Primary data<br>Data from computer simulaton<br>Ecoinvent v2.2 |

| Title and Authors                                                                                                                                                                                                                                                                    | Product                                            | Raw Material | Comparison with other polymers | Multifunctionality               | System Boundaries | Software          | LCIA Methodology | Databases                                                    |
|--------------------------------------------------------------------------------------------------------------------------------------------------------------------------------------------------------------------------------------------------------------------------------------|----------------------------------------------------|--------------|--------------------------------|----------------------------------|-------------------|-------------------|------------------|--------------------------------------------------------------|
| Corn-based Polylactide vs. PET Bottles - Cradle-to-gate LCA and Implications [92]                                                                                                                                                                                                    | 500 ml water bottle                                | Corn         | PET                            | NA                               | Cradle-to-gate    | SimaPro           | CED              | Data from companies<br>BioGrace software<br>Ecoinvent v. 2.2 |
| Facility arrangements and the environmental performance of disposable and reusable cups [93]<br>From “farm to fork” strawberry system: Current realities and potential innovative scenarios from life cycle assessment of non-renewable energy use and greenhouse gas emissions [94] | Cup                                                | Corn         | PS                             | End-of-life processes allocation | Cradle-to-grave   | SimaPro and Excel | CML<br>CED       | Ecoinvent                                                    |
| Multiple data sets and modelling choices in a comparative LCA of                                                                                                                                                                                                                     | 250-gramme flow pack                               | NA           | Mater-BI and PE                | NA                               | Cradle-to-grave   | SimaPro           | IPCC             | Data from local producers<br>Ecoinvent v. 2.2                |
|                                                                                                                                                                                                                                                                                      | Disposable beverage cup fit for serving 180 ml hot | Corn         | PS                             | End-of-life processes allocation | Cradle-to-grave   | SimaPro           | CML<br>CED       | Data found in literature<br>Data from                        |

| Title and Authors                                                                                                            | Product                    | Raw Material     | Comparison with other polymers | Multifunctionality | System Boundaries | Software | LCIA Methodology                   | Databases                                                  |
|------------------------------------------------------------------------------------------------------------------------------|----------------------------|------------------|--------------------------------|--------------------|-------------------|----------|------------------------------------|------------------------------------------------------------|
| disposable beverage cups [95]                                                                                                | drinks by vending machines |                  |                                |                    |                   |          |                                    | companies<br>ELCD database<br>Ecoinvent<br>PlasticsEurope  |
| Bio-production from Australian sugarcane: an environmental investigation of product diversification in an agro-industry [96] | NA                         | Sugarcane        | NA                             | NA                 | NA                | SimaPro  | Impact 2002+                       | Data found in literature                                   |
| Life cycle assessment of bio-based products: a disposable diaper case study (Mirabella et al., 2013)[97]                     | Diaper                     | Corn             | Mater-BI                       | NA                 | Cradle-to-gate    | SimaPro  | ReCiPe 2008<br>IMPACT 2002+<br>CED | Data from literature<br>Data from the company<br>Ecoinvent |
| Life cycle assessment of single use thermoform boxes made from polystyrene (PS), polylactic acid, (PLA), and PLA/starch:     | Boxes                      | Cassava and Corn | PS                             | NA                 | Cradle-to-gate    | NA       | EDIP 2003                          | Thailand energy database<br>Ecoinvent v1.01 and 2.2        |

| Title and Authors                                                                                                                                                                                       | Product          | Raw Material                                     | Comparison with other polymers | Multifunctionality               | System Boundaries | Software | LCIA Methodology | Databases                                                       |
|---------------------------------------------------------------------------------------------------------------------------------------------------------------------------------------------------------|------------------|--------------------------------------------------|--------------------------------|----------------------------------|-------------------|----------|------------------|-----------------------------------------------------------------|
| cradle to consumer gate [98]<br>Accounting for the constrained availability of land: a comparison of bio-based ethanol, polyethylene, and PLA with regard to non-renewable energy use and land use [99] | 1000 kg product  | Corn, Wheat, Sugarbeet, Sugarcane and Miscanthus | NA                             | NA                               | Cradle-to-gate    | NA       | NREU             | Data found in literature<br>PlasticsEurope                      |
| To compost or not to compost: Carbon and energy footprints of biodegradable materials' waste treatment [100]                                                                                            | 1 kg of material | NA                                               | Mater-BI, PBAT and PHA         | End-of-life processes allocation | End-of-Life       | NA       | IPCC 2007 NREU   | Data found in literature<br>Data from unspecified LCI databases |
| Life Cycle Assessment of Polylactic Acid and Polyethylene Terephthalate Bottles for                                                                                                                     | 500-mL bottle    | Corn                                             | PET                            | NA                               | Cradle-to-grave   | SimaPro  | Ecoindicator 99  | Ecoinvent v.2.0<br>24 European production sites                 |

| Title and Authors                                                                                        | Product                                             | Raw Material | Comparison with other polymers | Multifunctionality               | System Boundaries | Software | LCIA Methodology     | Databases                                                                         |
|----------------------------------------------------------------------------------------------------------|-----------------------------------------------------|--------------|--------------------------------|----------------------------------|-------------------|----------|----------------------|-----------------------------------------------------------------------------------|
| Drinking Water [37]                                                                                      |                                                     |              |                                |                                  |                   |          |                      |                                                                                   |
| Bioplastics disposal: How to manage it [101]                                                             | Bottles of 1,5 litres                               | Corn         | Mater-BI                       | End-of-life processes allocation | Cradle-to-gate    | SimaPro  | IPCC Ecoindicator 99 | Ecoinvent v.2.0<br>Eco-profiles of the European plastics industry                 |
| Twisting biomaterials around your little finger: environmental impacts of bio-based wrappings [102]      | Packaging film                                      | Corn         | Bio-PE, PET and PP             | NA                               | Cradle-to-grave   | NA       | CML                  | Data from companies<br>Data from unspecified LCI databases                        |
| Life cycle assessment of the manufacture of lactide and PLA biopolymers from sugarcane in Thailand [103] | 1 tonne of material at the factory gate in Thailand | Sugarcane    | NA                             | NA                               | Cradle-to-gate    | NA       | NA                   | European Plastics Association's database<br>Data from literature<br>GaBi database |

| Title and Authors                                                                                  | Product         | Raw Material | Comparison with other polymers | Multifunctionality | System Boundaries | Software | LCIA Methodology | Databases                                  |
|----------------------------------------------------------------------------------------------------|-----------------|--------------|--------------------------------|--------------------|-------------------|----------|------------------|--------------------------------------------|
| Environmental assessment of biodegradable multilayer film derived from carbohydrate polymers [104] | Multilayer film | Corn         | PP                             | NA                 | Cradle-to-grave   | SimaPro  | NA               | PlasticsEurope<br>Data found in literature |
| Biodegradable Packaging Life-Cycle Assessment [105]                                                | Yogurt package  | Corn         | PP                             | NA                 | Cradle-to-grave   | NA       | NA               | NA                                         |
