# Supplementary material
Source: MDPI journal article supplement (https://www.mdpi.com/2071-1050/15/16/12470)
Supplement: s1 [file s1]

**Table S3.** Original values of plastics used to create Table 2.

| Ref  | Plastic | Reference Flow                           | Ozone Layer Depletion<br>(Kg CFC-11 eq/kg plastic) | Climate Change<br>(Kg CO <sub>2</sub> eq/kg plastic) | Fresh Water Eutrophication<br>(Kg P eq/kg plastic) | Marine Eutrophication<br>(Kg N eq/kg plastic) | Human Toxicity<br>(Kg 1,4-DB eq/kg plastic) |
|------|---------|------------------------------------------|----------------------------------------------------|------------------------------------------------------|----------------------------------------------------|-----------------------------------------------|---------------------------------------------|
| [1]  | PET     | 19.10 g for each 500 ml bottle           | 9,82E-06                                           | 0,134                                                | NA                                                 | NA                                            | 0,05                                        |
| [3]  | PET     | 5.5 kg for a 1000 cups                   | 1,00E-05                                           | 2,19E+00                                             | 4,91E-04                                           | 1,91E-03                                      | NA                                          |
|      | PP      | 3.9 kg for a 1000 cups                   | 3,54E-08                                           | 1,65E+00                                             | 5,19E-05                                           | 1,15E-03                                      | NA                                          |
| [21] | PET     | 32.64 kg for a 1000 packages             | 9,48E-05                                           | NA                                                   | NA                                                 | NA                                            | NA                                          |
|      | PS      | 24.96 kg for a 1000 packages             | 8,71E-05                                           | NA                                                   | NA                                                 | NA                                            | NA                                          |
| [60] | PET     | 16.35 kg for a 1000 250 ml water bottles | NA                                                 | NA                                                   | NA                                                 | NA                                            | NA                                          |
| [56] | PP      | 1 kg                                     | 2,20E-07                                           | NA                                                   | NA                                                 | 6,06E-04                                      | NA                                          |
| [5]  | HDPE    | 1 kg                                     | 6,20E-09                                           | NA                                                   | NA                                                 | NA                                            | NA                                          |
|      | LDPE    | 1 kg                                     | 5,62E-08                                           | NA                                                   | NA                                                 | NA                                            | NA                                          |
|      | TPS     | 1 kg                                     | 1,46E-07                                           | NA                                                   | NA                                                 | NA                                            | NA                                          |
| [23] | PBS     | 1 kg                                     | 3,80335E-10                                        | 0,956666667                                          | 0,0000455                                          | 0,008913333                                   | 0,128                                       |
| [53] | LPDE    | 138 g for each film                      | NA                                                 | 0,5608                                               | -0,000033                                          | 1,84E-04                                      | NA                                          |

| Ref  | Plastic | Reference Flow                    | Ozone Layer Depletion<br>(Kg CFC-11 eq/kg plastic) | Climate Change<br>(Kg CO <sub>2</sub> eq/kg plastic) | Fresh Water Eutrophication<br>(Kg P eq/kg plastic) | Marine Eutrophication<br>(Kg N eq/kg plastic) | Human Toxicity<br>(Kg 1,4-DB eq/kg plastic) |
|------|---------|-----------------------------------|----------------------------------------------------|------------------------------------------------------|----------------------------------------------------|-----------------------------------------------|---------------------------------------------|
| [37] | PET     | 12.2 kg for a 1000 500 ml bottles | NA                                                 | NA                                                   | NA                                                 | NA                                            | NA                                          |
| [25] | PP      | 7 g for each cup                  | 4,68E-06                                           | 0,019                                                | NA                                                 | NA                                            | NA                                          |
|      | PET     | 9 g for each cup                  | 1,63E-04                                           | 0,033                                                | NA                                                 | NA                                            | NA                                          |
| [11] | PP      | 1000 kg                           | 1,41E-05                                           | NA                                                   | NA                                                 | NA                                            | 106,91                                      |
|      | LDPE    | 1000 kg                           | 1,42E-05                                           | NA                                                   | NA                                                 | NA                                            | 147,83                                      |
|      | HDPE    | 1000 kg                           | 1,43E-05                                           | NA                                                   | NA                                                 | NA                                            | 119,49                                      |
| [29] | PET     | 25.2 g for each 1L package        | 2,57E-09                                           | 5,53E-02                                             | 1,34E-05                                           | NA                                            | NA                                          |
|      | HDPE    | 31.6 g for each 1L package        | 1,40E-09                                           | 5,21E-02                                             | 5,71E-06                                           | NA                                            | NA                                          |
| [30] | PET     | 23.5 kg kg for a 1000 1 L bottles | 3,36E-05                                           | NA                                                   | NA                                                 | NA                                            | NA                                          |
| [33] | PET     | 1 tonne                           | NA                                                 | 2,80E+03                                             | 6,37E-01                                           | 3,13                                          | 7,67E+02                                    |
| [31] | Ham-PVA | 1 kg                              | 5,58E-07                                           | 4,260198                                             | 0,001091                                           | 0,001531                                      | 0,934583                                    |
|      | PVF     | 1 kg                              | 1,14E-06                                           | 16,65613                                             | 0,007002                                           | 0,002663                                      | 6,327723                                    |
| [32] | PS      | 11.90 g for each 1 L tray         | 1,40E-11                                           | 7,30E-02                                             | 8,20E-07                                           | 2,50E-05                                      | NA                                          |
|      | PET     | 11.90 g for each 1 L tray         | 1,40E-11                                           | 9,90E-02                                             | 8,90E-07                                           | 3,50E-05                                      | NA                                          |

| Ref  | Plastic | Reference Flow                         | Ozone Layer Depletion<br>(Kg CFC-11 eq/kg plastic) | Climate Change<br>(Kg CO <sub>2</sub> eq/kg plastic) | Fresh Water Eutrophication<br>(Kg P eq/kg plastic) | Marine Eutrophication<br>(Kg N eq/kg plastic) | Human Toxicity<br>(Kg 1,4-DB eq/kg plastic) |
|------|---------|----------------------------------------|----------------------------------------------------|------------------------------------------------------|----------------------------------------------------|-----------------------------------------------|---------------------------------------------|
| [37] | PP      | 11.90 g for each 1 L tray              | 1,11E-11                                           | 5,00E-02                                             | 5,00E-07                                           | 1,50E-05                                      | NA                                          |
|      | PET     | 12.2 kg of PET for 1000 500 ml bottles | NA                                                 | NA                                                   | NA                                                 | NA                                            | NA                                          |
