# Supplementary material
Source: MDPI journal article supplement (https://www.mdpi.com/2071-1050/15/16/12470)
Supplement: s1 [file s1]

**Table S2.** Original values for PLA used to create Table 2.

| Ref  | Reference Flow                                  | Ozone Layer<br>(Kg CFC-11 eq/kg<br>plastic) | Climate change<br>(Kg CO <sub>2</sub> eq/kg<br>plastic) | Fresh water<br>eutrophication<br>(Kg P eq/kg plastic) | Marine<br>eutrophication<br>(Kg N eq/kg<br>plastic) | Human toxicity<br>(Kg 1,4-DB eq/kg<br>plastic) |
|------|-------------------------------------------------|---------------------------------------------|---------------------------------------------------------|-------------------------------------------------------|-----------------------------------------------------|------------------------------------------------|
| [1]  | 11.28 g for each 500 ml PLA<br>bottle           | NA                                          | 0,616                                                   | NA                                                    | NA                                                  | 0,218                                          |
| [3]  | 4.6 kg for a 1000 PLA cups                      | -7,99E-07                                   | 17,48                                                   | 1,07E-03                                              | 4,18E-02                                            | NA                                             |
| [21] | 30,54 kg for a 1000 PLA<br>packages             | 9,15E-05                                    | NA                                                      | NA                                                    | NA                                                  | NA                                             |
| [22] | 1 tonne of PLA residues                         | 1,54E-07                                    | NA                                                      | 0,0025                                                | 0,56                                                | NA                                             |
| [34] | 1 tonne of PLA                                  | NA                                          | NA                                                      | NA                                                    | 13,3                                                | NA                                             |
| [60] | 16.26 kg for a 1000 250 ml<br>PLA water bottles | NA                                          | NA                                                      | NA                                                    | NA                                                  | NA                                             |
| [56] | 1 kg of PLA                                     | 81,9                                        | NA                                                      | NA                                                    | 58,38                                               | NA                                             |
| [5]  | 1 kg of PLA                                     | NA                                          | NA                                                      | NA                                                    | 1,30E-03                                            | NA                                             |
| [23] | 1 kg of PLA                                     | 5,74042E-10                                 | 4,62                                                    | -0,00002139                                           | 0,011525                                            | 0,1571                                         |
| [53] | 188 g for each PLA film                         | 8,4                                         | 0,5837                                                  | -0,0000185                                            | 1,16E-03                                            | NA                                             |
| [37] | 12.2 kg for a 1000 500 ml PLA<br>bottles        | NA                                          | NA                                                      | NA                                                    | NA                                                  | NA                                             |
| [24] | 48 kg for a 1000<br>900 ml bottles              | 1,58E-08                                    | NA                                                      | NA                                                    | NA                                                  | NA                                             |
| [25] | 8.5 g of PLA for each cup                       | 0,000064195                                 | 0,3165                                                  | NA                                                    | NA                                                  | NA                                             |

| Ref  | Reference Flow                            | Ozone Layer<br>(Kg CFC-11 eq/kg<br>plastic) | Climate change<br>(Kg CO <sub>2</sub> eq/kg<br>plastic) | Fresh water<br>eutrophication<br>(Kg P eq/kg plastic) | Marine<br>eutrophication<br>(Kg N eq/kg<br>plastic) | Human toxicity<br>(Kg 1,4-DB eq/kg<br>plastic) |
|------|-------------------------------------------|---------------------------------------------|---------------------------------------------------------|-------------------------------------------------------|-----------------------------------------------------|------------------------------------------------|
| [26] | 1 kg of PLA                               | 1,70E-06                                    | 4,62                                                    | 0,002                                                 | NA                                                  | NA                                             |
| [28] | 0.84 kg of PLA                            | 0,000013                                    | NA                                                      | 1,90E-03                                              | 1,20E-03                                            | NA                                             |
| [11] | 1000 kg of PLA                            | NA                                          | NA                                                      | NA                                                    | NA                                                  | 1210,98                                        |
| [29] | 25.2 g of PLA for each 1L<br>package      | 1,01E-09                                    | 4,27E-02                                                | 3,36E-06                                              | NA                                                  | NA                                             |
| [30] | 22.8 kg for a 1000<br>1 L PLA bottles     | 0,00004                                     | NA                                                      | NA                                                    | NA                                                  | 354,27                                         |
| [58] | 1.33 g of PLA for each straw              | 26                                          | NA                                                      | NA                                                    | NA                                                  | NA                                             |
| [33] | 1 tonne of PLA                            | NA                                          | 3,13E+03                                                | 1,32                                                  | 9,81                                                | 2,05E+03                                       |
| [57] | 1 kg of PLA                               | NA                                          | NA                                                      | NA                                                    | NA                                                  | NA                                             |
| [31] | 1 kg of PLA                               | 4,76E-07                                    | 9,221                                                   | 0,0045                                                | 0,007                                               | 2,914                                          |
| [27] | 1 kg of PLA                               | 6,13E-06                                    | NA                                                      | 3,45E-03                                              | 7,15E-04                                            | NA                                             |
| [37] | 12.2 kg of PLA for 1000 500<br>ml bottles | NA                                          | NA                                                      | NA                                                    | NA                                                  | NA                                             |
| [32] | 13.9 of PLA for each 1 L tray             | 1,91E-11                                    | 0,054                                                   | 1,02E-06                                              | 2,55E-04                                            | NA                                             |
